# Supplementary material for: Effect of in-plane and out-of-plane bifurcated microfluidic channels on the flow of aggregating red blood cells
Source: Royal Society of Chemistry journal article supplement (doi:10.1039/d4lc00151f), 2024-01-01
Supplement: d4lc00151f1.pdf [file d4lc00151f1.pdf]

## Effect of in-plane and out-of-plane bifurcated microfluidic channels on the flow of aggregating red blood cells

Amirreza Gholivand,<sup>a,b</sup> Olivera Korculanin,<sup>c,d</sup> Knut Dahloff,<sup>e</sup> Mehrnaz Babaki,<sup>a,b</sup> Timo Dickscheid,<sup>e,f</sup> Minne Paul Lettinga<sup>a,b\*</sup>

### Supplementary Text

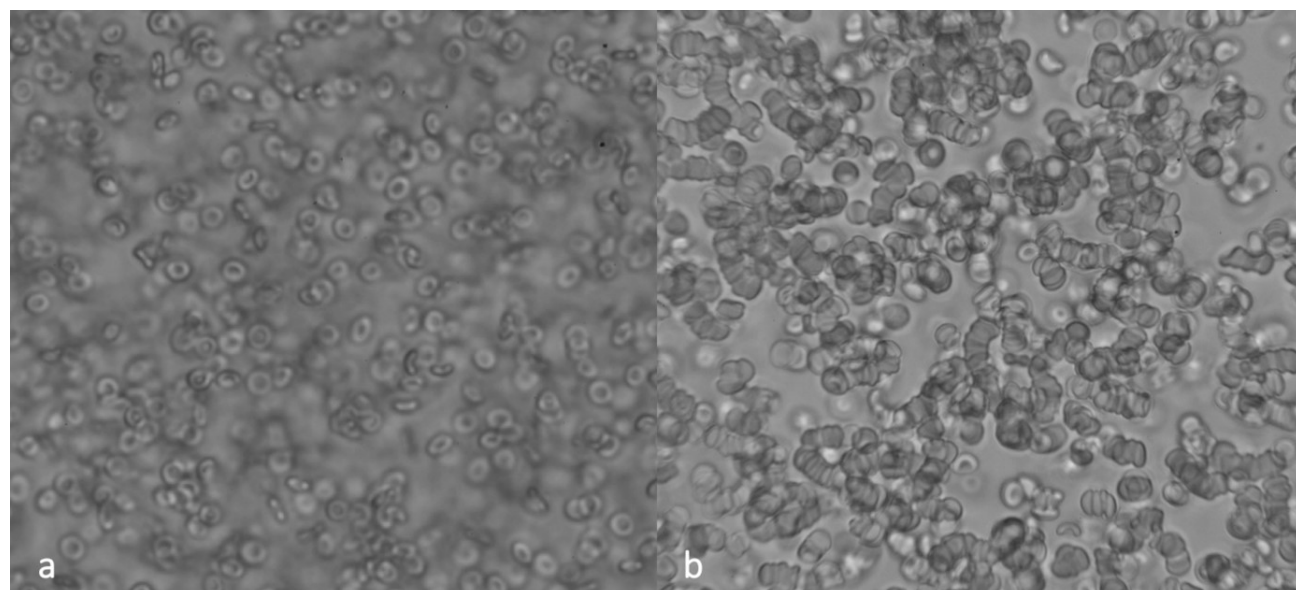

**Figure S1.**

An example of the prepared sample under equilibrium condition at hematocrit of 10% observed using 50x Air objective. (a) represents RBCs sample in absence of the Dextran, (b) example of the aggregated sample due to presence of the Dextran.

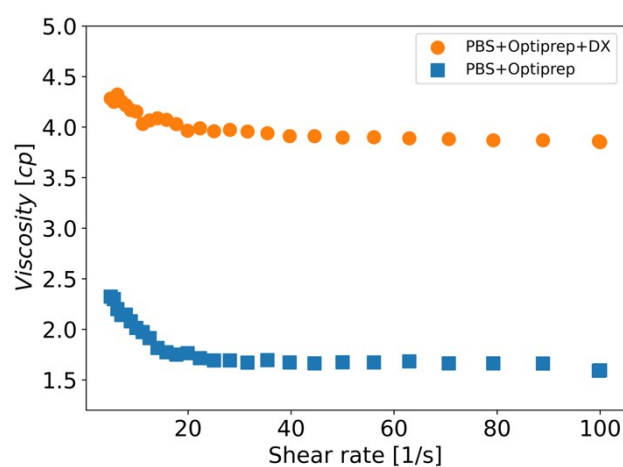

**Figure S2.**

Measured viscosity of the PBS-Optiprep with and without Dextran.

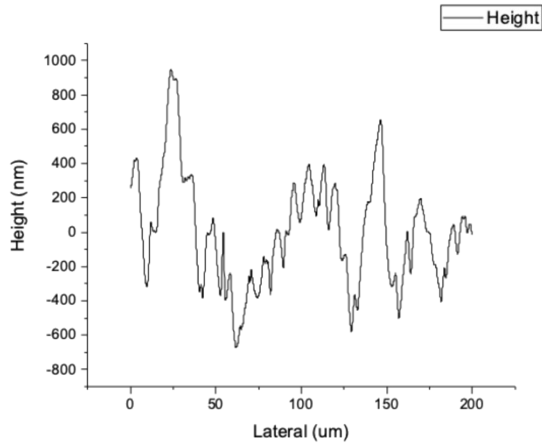

**Figure S3.**

Measured roughness of the fabricated chip using DektakXT profilometer (Bruker, US). The measured results indicate the roughness of the surface in the order of a  $1.5 \mu\text{m}$ .

**The videos are show cases and thus represent only 2 % of the total movie.**

**Movie S1.**

Blood flow through a 3D geometry with  $L/D = 3$  and hematocrit of  $H5_{\text{dex}}$  (5% volume fraction of RBCs and  $50 \text{ mg ml}^{-1}$  dextran to induce aggregation). The flow rate is  $30 \mu\text{l min}^{-1}$  that matches physiological conditions. Bright field microscopy taken with an exposure time of  $200 \mu\text{s}$ . The scale bar represents  $20 \mu\text{m}$

**Movie S2.**

Blood flow through a 3D geometry with  $L/D = 3$  and hematocrit of  $H10_{\text{dex}}$ . The flow rate is  $30 \mu\text{l min}^{-1}$  that matches physiological conditions. Bright field microscopy taken with an exposure time of  $200 \mu\text{s}$ . The scale bar represents  $40 \mu\text{m}$ .

**Movie S3.**

Blood flow through a 3D geometry with  $L/D = 3$  and hematocrit of  $H20_{\text{dex}}$ . The flow rate is  $30 \mu\text{l min}^{-1}$  that matches physiological conditions. Bright field microscopy taken with an exposure time of  $200 \mu\text{s}$ . The scale bar represents  $20 \mu\text{m}$

**Movie S4.**

Blood flow through a 3D geometry with  $L/D = 6$  and hematocrit of  $H20_{\text{dex}}$ . The flow rate is  $30 \mu\text{l min}^{-1}$  that matches physiological conditions. Bright field microscopy taken with an exposure time of  $200 \mu\text{s}$ . The scale bar represents  $20 \mu\text{m}$ .

**Movie S5.**

Blood flow through a 3D geometry with  $L/D = 9$  and hematocrit of  $H_{20_{dex}}$ . The flow rate is  $30 \mu l min^{-1}$  that matches physiological conditions. Bright field microscopy taken with an exposure time of  $200 \mu s$ . The scale bar represents  $20 \mu m$ .

**Movie S6.**

Flow dispersion of  $2 \mu m$  polystyrene beads through a 3D geometry with  $L/D = 3$  and volume fraction of 10%. The flow rate is  $30 \mu l min^{-1}$  that matches physiological conditions. Bright field microscopy taken with an exposure time of  $200 \mu s$ . The scale bar represents  $40 \mu m$ .

**Movie S7.**

The central segment of Movie S5 captured using bright-field microscopy with an exposure time of  $200 \mu s$ . This extended sequence provides evidence that RBCs are not subject to jamming or adhesion along the channel walls. However, between 1 to 3 seconds into the footage, a tumbling RBC is observed within the region marked by the red rectangle. Following this occurrence, no further events are detected for the subsequent 13 seconds. The scale bar indicates a length of  $10 \mu m$ .
